# Supplementary material for: Effectiveness and Safety of High-Dose Dual Therapy: Results of the European Registry on the Management of Helicobacter pylori Infection (Hp-EuReg)
Source: MDPI journal article supplement (doi:10.3390/jcm11123544), 2022-06-20
Supplement: s1 [file s1]

Supplementary file.

**Table S1.** Regimens used as first and rescue treatment lines in the 60 patients who received HDDT.

| Treatment line | PPI-A(B) HDDT<br>n/N (%) | PPI-M+Tc+B<br>n/N (%) | PPI-C+A<br>n/N (%) | PPI-A+L/M<br>n/N (%) | PPI-A+Rf<br>n/N (%) | PPI-C+A+M/T<br>Conc<br>n/N (%) | PPI+ single capsule*<br>n/N (%) | PPI-A+L/M+B<br>n/N (%) | PPI-A+M/T<br>n/N (%) | PPI-A+Rf+B<br>n/N (%) | PPI-C+A+M/T<br>Seq<br>n/N (%) | PPI-A+Rx<br>n/N (%) | PPI-C+A+M/T<br>Hyb<br>n/N (%) |
|----------------|--------------------------|-----------------------|--------------------|----------------------|---------------------|--------------------------------|---------------------------------|------------------------|----------------------|-----------------------|-------------------------------|---------------------|-------------------------------|
| 1st<br>N=60    | 19/60 (31%)              | 1/60 (1.6%)           | 28/60 (46.6%)      | 2/60 (3.33%)         | 0/60 (0%)           | 5/60 (8.3%)                    | 1/60 (1.6%)                     | 0/60 (0%)              | 1/60 (1.6%)          | 1/60 (1.6%)           | 1/60 (1.6%)                   | 0/60 (0%)           | 1/60 (1.6%)                   |
| 2nd<br>N=41    | 4/41 (9.7%)              | 2/41 (4.8%)           | 1/41 (2.4%)        | 23/41 (56%)          | 0/41 (0%)           | 1/41 (2.4%)                    | 3/41 (7.3%)                     | 3/41 (7.3%)            | 4/41 (9.7%)          | 0/41 (0%)             | 0/41 (0%)                     | 0/41 (0%)           | 0/41 (0%)                     |
| 3rd<br>N=37    | 5/37 (13.5%)             | 20/37 (54%)           | 1/37 (2.7%)        | 3/37 (8.1%)          | 0/37 (0%)           | 1/37 (2.7%)                    | 2/37 (5.4%)                     | 3/37 (8.1%)            | 0/37 (0%)            | 0/37 (0%)             | 2/37 (5.4%)                   | 0/37 (0%)           | 0/37 (0%)                     |
| 4th<br>N=32    | 2/32 (6.2%)              | 6/32 (18.7%)          | 0/32 (0%)          | 0/32 (0%)            | 13/32 (40.6%)       | 2/32 (6.2%)                    | 1/32 (3.1%)                     | 0/32 (0%)              | 0/32 (0%)            | 3/32 (9.3%)           | 1/32 (3.1%)                   | 4/32 (12.5%)        | 0/32 (0%)                     |
| 5th<br>N=30    | 23/30 (76.6%)            | 1/30 (3.3%)           | 0/30 (0%)          | 1/30 (3.3%)          | 2/30 (6.6%)         | 2/30 (6.6%)                    | 0/30 (0%)                       | 0/30 (0%)              | 0/30 (0%)            | 1/30 (3.3%)           | 0/30 (0%)                     | 0/30 (0%)           | 0/30 (0%)                     |
| 6th<br>N=7     | 7/7 (100%)               | 0/7 (0%)              | 0/7 (0%)           | 0/7 (0%)             | 0/7 (0%)            | 0/7 (0%)                       | 0/7 (0%)                        | 0/7 (0%)               | 0/7 (0%)             | 0/7 (0%)              | 0/7 (0%)                      | 0/7 (0%)            | 0/7 (0%)                      |
|                | 60                       | 30                    | 30                 | 29                   | 15                  | 11                             | 7                               | 6                      | 5                    | 5                     | 4                             | 4                   | 4                             |

\* Three-in-one single capsule containing bismuth, tetracycline and metronidazole. A, amoxicillin; B, bismuth salts; C, clarithromycin; Conc, concomitant; HDDT, high-dose dual therapy; Hyb, hybrid; L/M, levofloxacin/moxifloxacin; n, number of patients with each treatment regimen; N, number of patients with different line of treatment; M/T, metronidazole/tinidazole; PPI, proton pump inhibitor; Rf, rifabutin; Rx, rifaximin; Seq, sequential; Tc, tetracycline.
